# Supplementary material for: Commercial Free-Range Laying Hens’ Preferences for Shelters with Different Sunlight Filtering Percentages
Source: MDPI journal article supplement (doi:10.3390/ani12030344), 2022-01-31
Supplement: s1 [file s1]

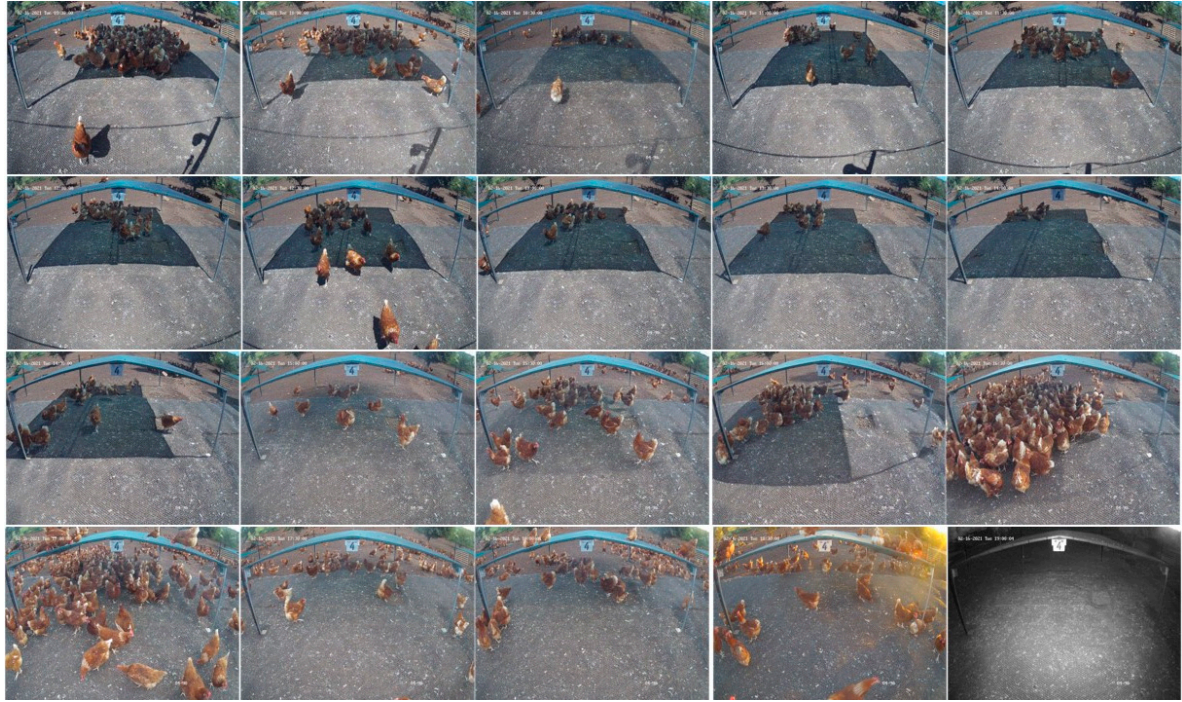

**Figure S1.** Snapshots of one of the 90% UV-filtering shelters in Flock-B showing use of the shelter and the immediate surrounding range area across one day.
